# Supplementary material
Source: MDPI journal article supplement (https://www.mdpi.com/2073-4344/13/3/534)
Supplement: s1 [file s1]

Supplementary data

## Photocatalytic performance of Sn-doped $\text{TiO}_2$ nanopowders for photocatalytic degradation of methyl orange dye

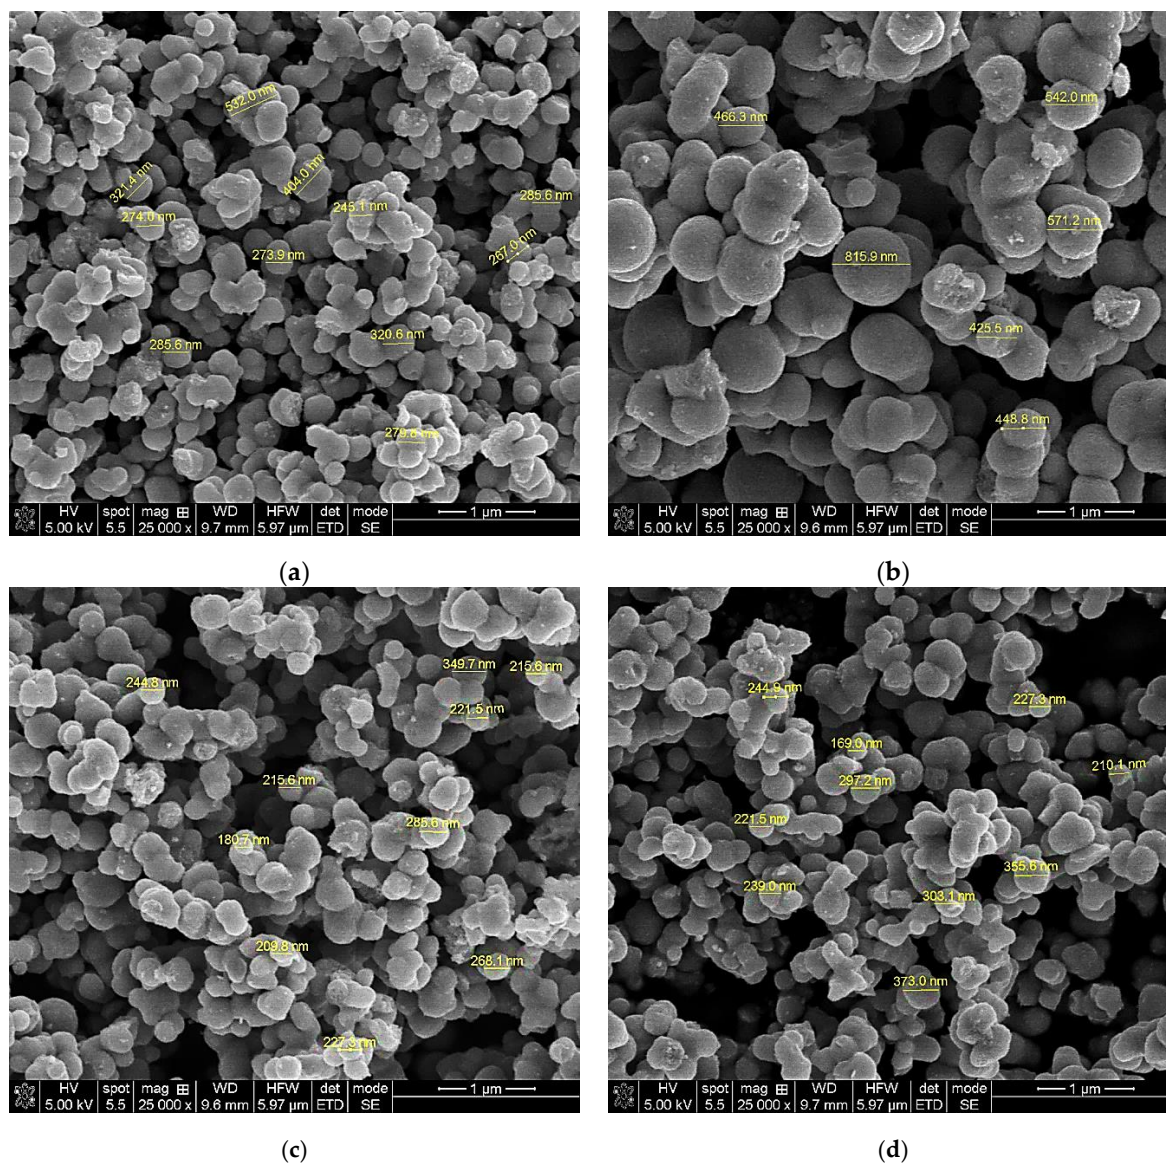

**Figure S1.** SEM images with particle sizes measurements of thermally treated samples (a) 2Sn- $\text{TiO}_2$  SG, (b) 2Sn- $\text{TiO}_2$  MW, (c) 1Sn- $\text{TiO}_2$  MW and (d) 4Sn- $\text{TiO}_2$  MW, respectively.

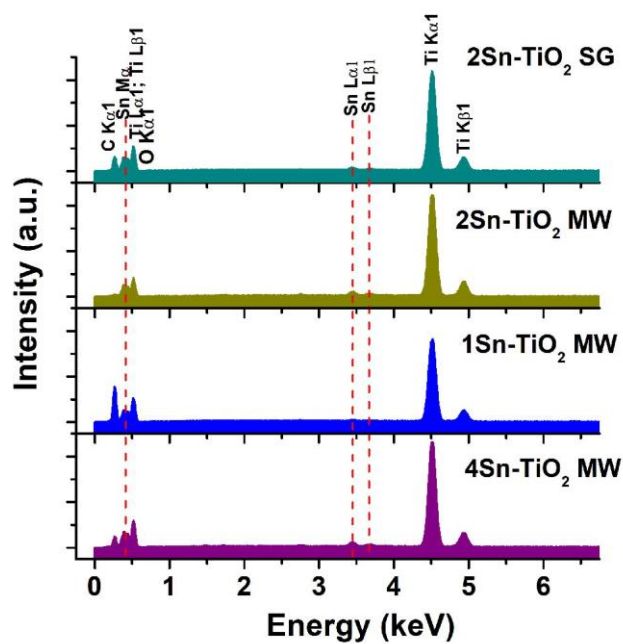

**Figure S2.** EDX spectra of the Sn-doped TiO<sub>2</sub> powders.

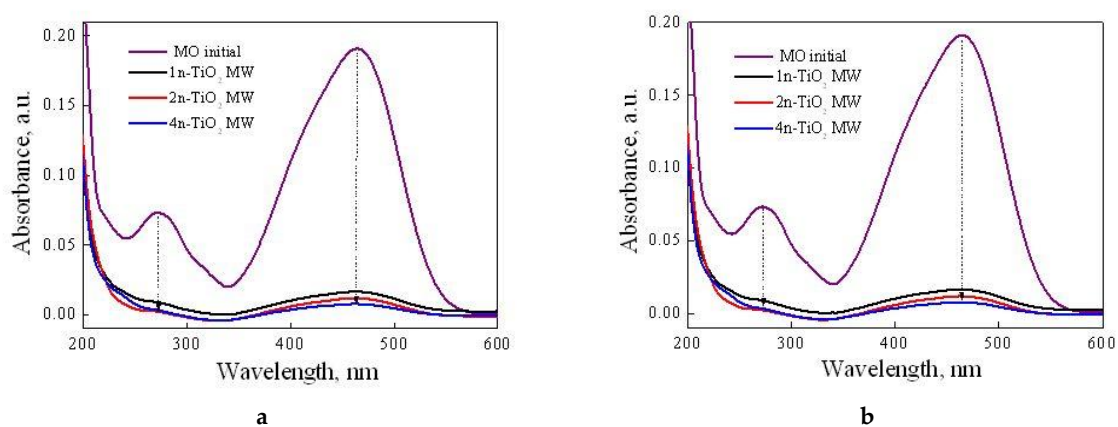

**Figure S3.** UV-Vis absorbance spectra of MO before and after photocatalytic experiment using xSn-TiO<sub>2</sub> MW materials under (a) UV and (b) visible light irradiation.
